# Supplementary material
Source: PubMed Central journal article supplement (PMC4542255)
Supplement: AEM.00133-15_zam999116558so1.pdf [file AEM.00133-15_zam999116558so1.pdf]

## **Supplements**

1. **Meersman E, Steensels J, Mathawan M, Wittcox PJ, Saels V, Struyf N, Bernaert H, Vrancken G, Verstrepen KJ.** 2013. Detailed analysis of the microbial population in Malaysian spontaneous cocoa pulp fermentations reveals a core and variable microbiota. *PLOS ONE* **8**:e81559. doi:10.1371/journal.pone.0081559.
2. **Young TW, Yagiu M.** 1978. A comparison of the killer character in different yeasts and its classification. *Antonie Van Leeuwenhoek* **44**:59-77.
3. **van Wyk H, Divol B.** 2010. Recovery of endo-polygalacturonase activity in wine yeast and its effect on wine aroma. *FEMS Yeast Res.* **10**:58-71.
4. **Warringer J, Zorgo E, Cubillos FA, Zia A, Gjuvsland A, Simpson JT, Forsmark A, Durbin R, Omholt SW, Louis EJ, Liti G, Moses A, Blomberg A.** 2011. Trait variation in yeast is defined by population history. *PLoS Genet.* **7**:e1002111. doi:10.1371/journal.pgen.1002111.

**Fig. S1.** Intraspecific diversity of the *Saccharomyces cerevisiae* population in two spontaneous Malaysian cocoa pulp fermentations. Box fermentation 1 (B1, October 2011), heap fermentation 1 (H1, October 2011), as described in (1). Clustering of the strains based on the interdelta fingerprints of the different *S. cerevisiae* isolates (B1: 72 isolates, H1: 108 isolates). For similarities lower than 85%, a high-resolution fingerprint was used for confirmation (see Materials and Methods for details). Clusters consisting of the same (or very closely related) strain(s) are represented using a color code. Numbers next to branches indicate bootstrap values (%), based on 500 bootstrap simulations.

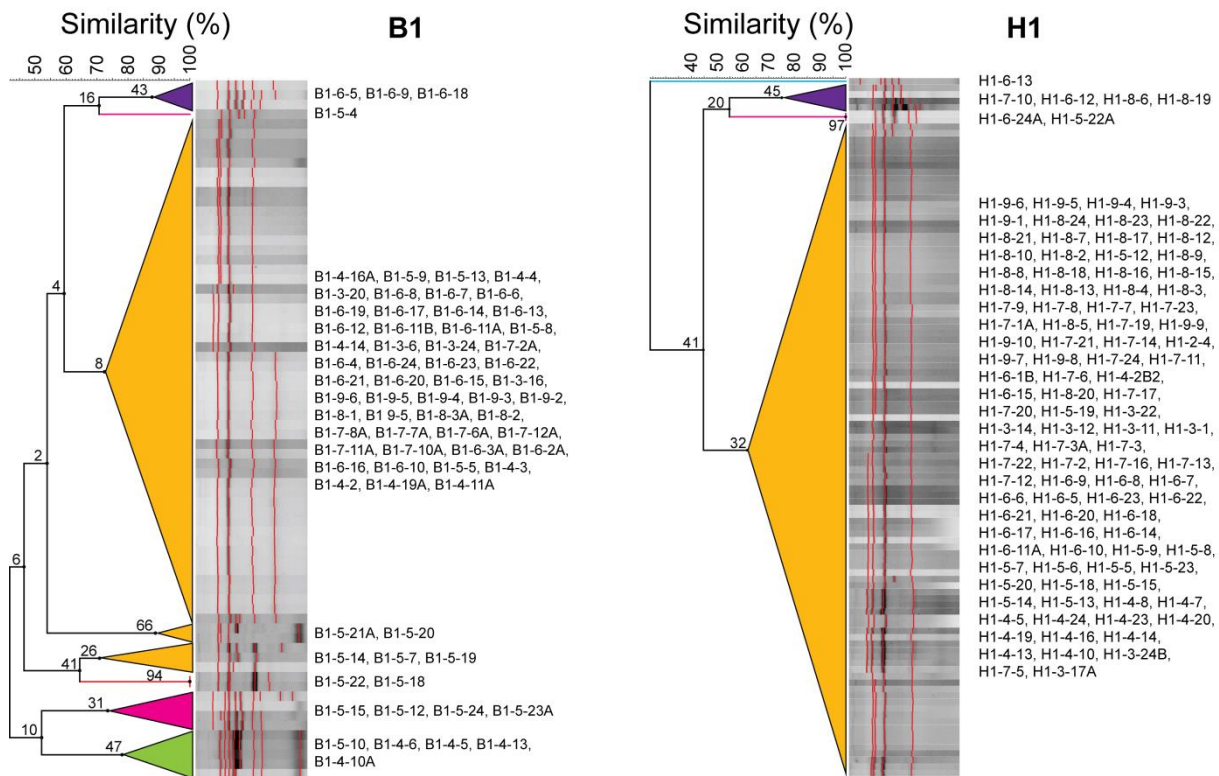

**Fig. S2.** Interdelta profiles of first-generation hybrids generated using mass mating. The thirty-two strains selected after mass mating (H1-H32) were identified as 13 outbred hybrids, 3 Y115 inbred strains, 15 Y927 inbreds and 1 Y927 haploid using mating type PCR and interdelta analysis. A representative selection of these different groups is shown as an illustration. Strains selected for lab- and pilot-scale fermentations are indicated in orange.

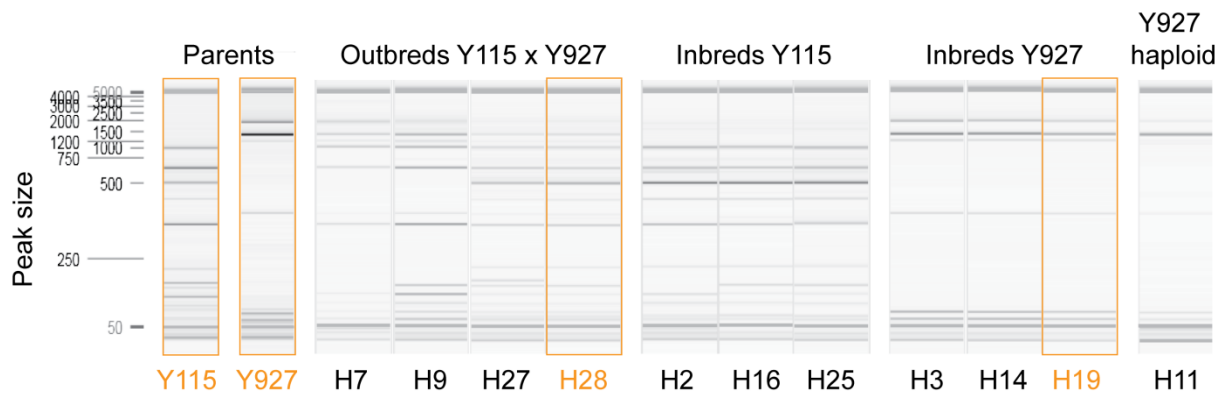

**Fig. S3.** Bioscreen experiments to check influence of Hygromycin B-resistance marker on growth rate. Six biological replicates were tested per strain (see Materials and Methods). A: 37°C (left), B: 41°C (right). Error bars indicate 95% confidence intervals.

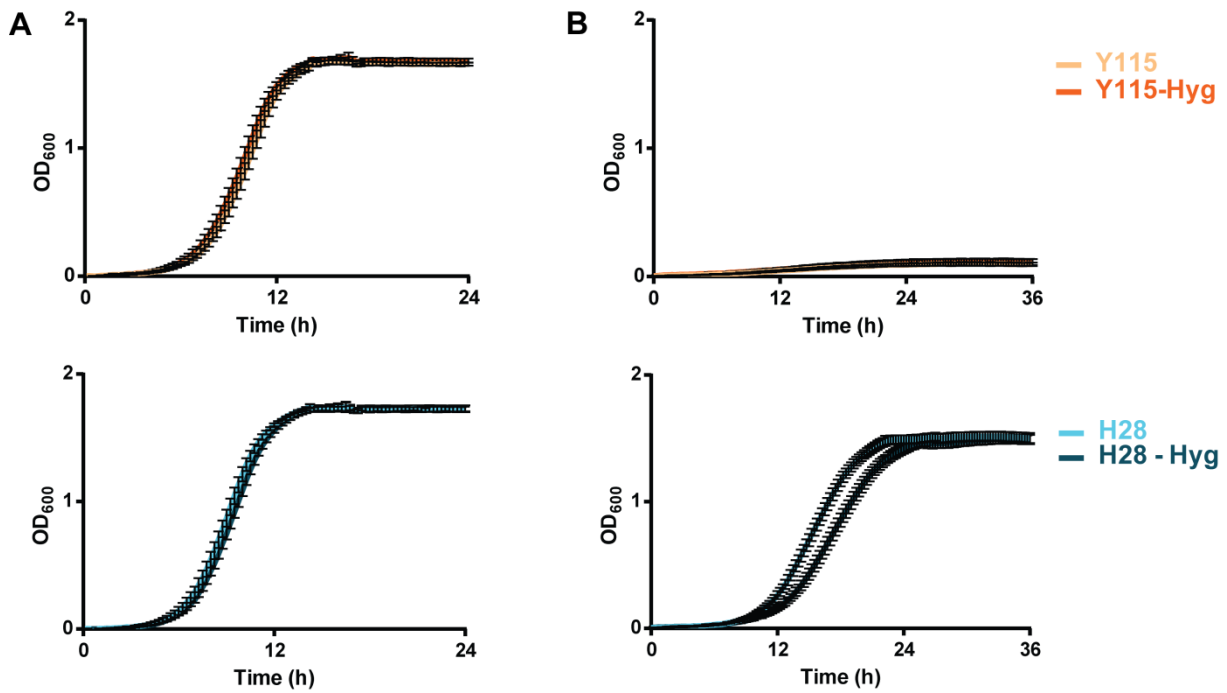

**Fig. S4.** Competition experiments in cocoa pulp with a Hygromycin (Hyg)-tagged transformant of the hybrid H28 and H37. Error bars represent the 95% confidence intervals, calculated based on three biological replicates. See Materials and Methods for details.

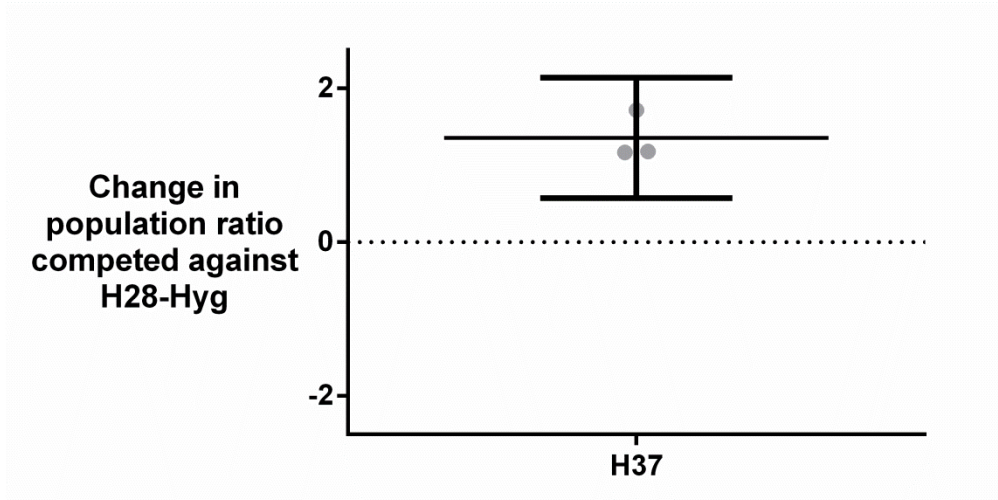

**Fig. S5.** Yeast population dynamics of inoculated fermentations in Malaysia (2013). All yeasts were tested in two independent fermentation assays, graphs displayed here are the “B”-duplicates from the inoculated fermentations shown in Fig. 4. Temperature (right axis) is indicated as a dashed black line. The dashed arrows indicate when the yeast cell count rises to or drops below the detection limit. Note that the scale for the total yeast count (left Y-axis) is logarithmic, whereas individual yeast species in the population at a given time point (indicated by the colors) are presented as the relative fraction of the total population on a linear scale. Absolute concentrations for individual species are given in Table S7. Percentages of identity are reported when <100% identity with type strain sequences (see Materials and Methods for details). Turning of the fermenting cocoa beans was carried out after 48 h of fermentation (solid vertical arrows). *C.*: *Candida*, *H.*: *Hanseniaspora*, *P.*: *Pichia*, *S.*: *Saccharomyces*, *T.*: *Torulaspora*.

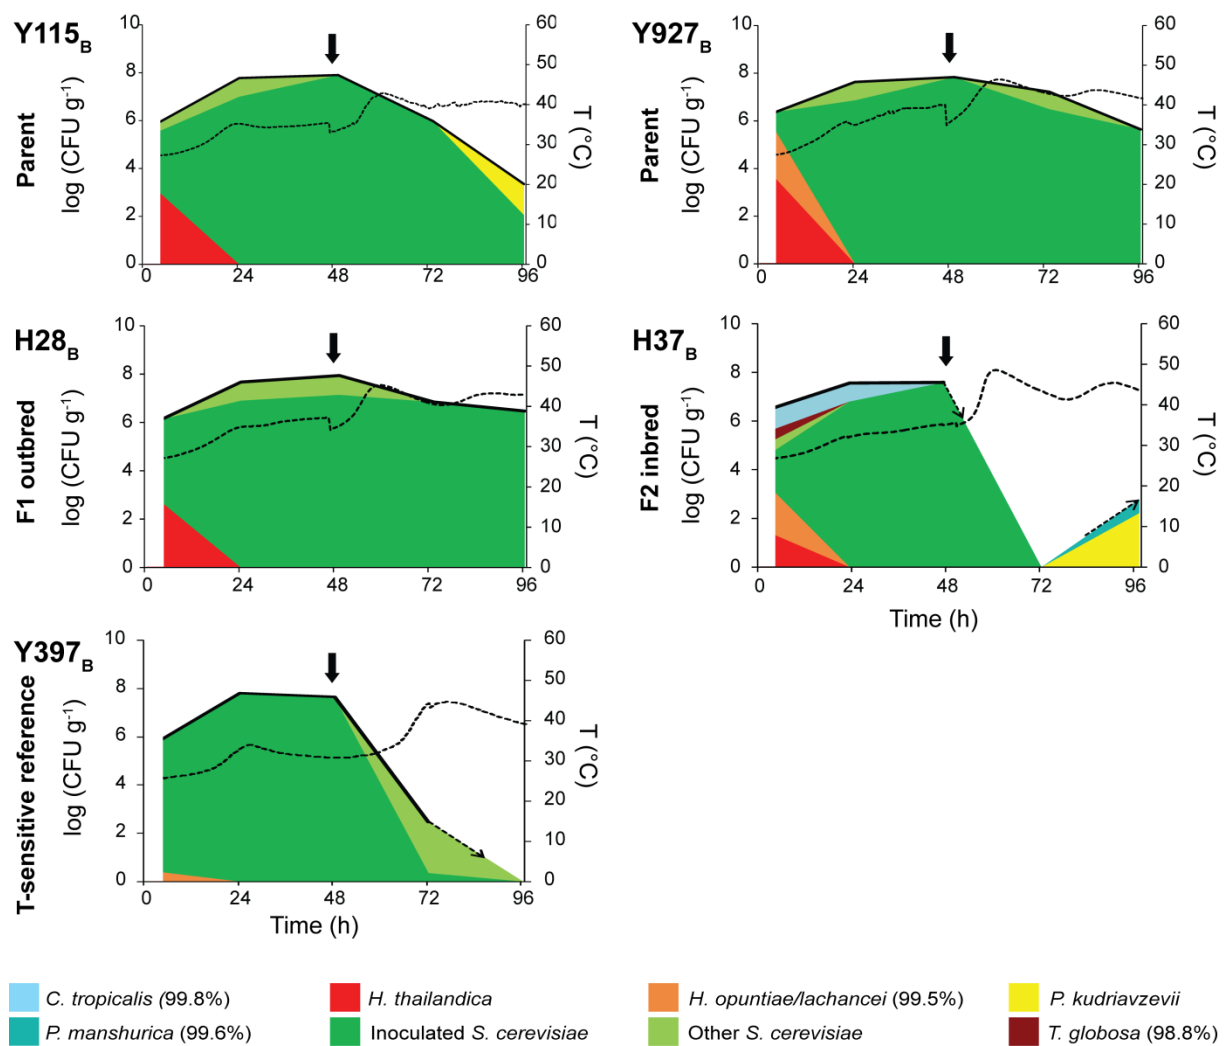

**Table S1.** Overview of 318 different industrial strains used in this study.

| Industry              | Number of strains |
|-----------------------|-------------------|
| Beer (ale)            | 121               |
| Wine                  | 71                |
| Feral (wild) isolates | 53                |
| Beer (lager)          | 31                |
| Sake                  | 14                |
| Spirits               | 11                |
| Bakery                | 10                |
| Bio-ethanol           | 7                 |

**Table S2.** Killer activity of first-generation hybrids resulting from mass mating Y115 and Y927.

| Strain code | Strain genotype              | Killer activity |
|-------------|------------------------------|-----------------|
| Y115        | Wild-type                    | -               |
| Y927        | Wild-type                    | ++              |
| H1          | Hybrid (Inbred Y927)         | ++              |
| H2          | Hybrid (Inbred Y115)         | -               |
| H3          | Hybrid (Inbred Y927)         | ++              |
| H4          | Hybrid (Inbred Y927)         | ++              |
| H5          | Hybrid (Outbred Y115 x Y927) | -               |
| H6          | Hybrid (Inbred Y927)         | ++              |
| H7          | Hybrid (Outbred Y115 x Y927) | -               |
| H8          | Hybrid (Inbred Y927)         | ++              |
| H9          | Hybrid (Outbred Y115 x Y927) | -               |
| H10         | Hybrid (Outbred Y115 x Y927) | -               |
| H11         | Haploid Y927                 | ++              |
| H12         | Hybrid (Outbred Y115 x Y927) | -               |
| H13         | Hybrid (Inbred Y927)         | ++              |
| H14         | Hybrid (Inbred Y927)         | ++              |
| H15         | Hybrid (Outbred Y115 x Y927) | -               |
| H16         | Hybrid (Inbred Y115)         | -               |
| H17         | Hybrid (Inbred Y927)         | ++              |
| H18         | Hybrid (Inbred Y927)         | ++              |
| H19         | Hybrid (Inbred Y927)         | ++              |
| H20         | Hybrid (Outbred Y115 x Y927) | -               |
| H21         | Hybrid (Inbred Y927)         | ++              |
| H22         | Hybrid (Outbred Y115 x Y927) | -               |
| H23         | Hybrid (Outbred Y115 x Y927) | -               |
| H24         | Hybrid (Outbred Y115 x Y927) | -               |
| H25         | Hybrid (Inbred Y115)         | -               |
| H26         | Hybrid (Outbred Y115 x Y927) | -               |
| H27         | Hybrid (Outbred Y115 x Y927) | -               |
| H28         | Hybrid (Outbred Y115 x Y927) | -               |
| H29         | Hybrid (Inbred Y927)         | ++              |
| H30         | Hybrid (Inbred Y927)         | ++              |
| H31         | Hybrid (Inbred Y927)         | ++              |
| H32         | Hybrid (Inbred Y927)         | ++              |

-: no activity, +: less than reference, ++: equal to reference, +++: more than reference NCYC1001 (killer type K2, (2)). Diploids resulting from mating two cells of opposite mating types of the same parent, either germinating spores or haploid segregants, were classified as inbreds.



**Table S3.** Statistical differences between parental strains and hybrids during competition experiments in cocoa pulp.

|          | Y115-Hyg        | Y927            |
|----------|-----------------|-----------------|
| Y115-Hyg | /               | 0.0261 (*)      |
| Y927     | 0.0261 (*)      | /               |
| H19      | 0.7431 (ns)     | 0.0057 (**)     |
| H28      | < 0.0001 (****) | < 0.0001 (****) |
| H37      | < 0.0001 (****) | < 0.0001 (****) |

P-values were calculated using Dunnett's multiple comparisons test. \*:  $p \leq 0.05$ , \*\*:  $p \leq 0.01$ , \*\*\*:  $p \leq 0.001$ , \*\*\*\*:  $p \leq 0.0001$ , ns: not significant. The comparison between Y115-Hyg and H19 is biologically not relevant, as the inbred H19 is only related to Y927. This value is therefore only given as an illustration.

**Table S4.** Overview of selected yeast strains for inoculated cocoa pulp fermentations in Malaysia.

|      | Killer activity | Polygalacturonase activity | Temperature tolerance |
|------|-----------------|----------------------------|-----------------------|
| H19  | ++              | +                          | +++                   |
| H28  | -               | -                          | +++                   |
| H37  | -               | -                          | +++                   |
| Y115 | -               | +                          | +++                   |
| Y397 | -               | -                          | +                     |
| Y927 | ++              | +                          | +++                   |

-: no activity, +: less than reference, ++: equal to reference, +++: more than reference. Reference for killer activity: NCYC1001 (killer type K2) (2), polygalacturonase activity: L2323 (3) and temperature tolerance: W303 (4).

**Table S5.** Temperature and pH of cocoa pulp in spontaneous and inoculated cocoa pulp fermentations in Malaysia (2013).

|                   | T (°C)         |                |                  |                  | pH              |                 |                   |                   |
|-------------------|----------------|----------------|------------------|------------------|-----------------|-----------------|-------------------|-------------------|
|                   | T <sub>i</sub> | T <sub>f</sub> | T <sub>min</sub> | T <sub>max</sub> | pH <sub>i</sub> | pH <sub>f</sub> | pH <sub>min</sub> | pH <sub>max</sub> |
| S <sub>A</sub>    | 25.9           | 43.9           | 25.7             | 49.3             | 3.8             | 4.1             | 3.6               | 4.1               |
| S <sub>B</sub>    | 25.6           | 42.3           | 25.5             | 45.8             | 3.8             | 4.3             | 3.7               | 4.3               |
| H19 <sub>A</sub>  | 26.1           | 42.8           | 26.0             | 48.1             | 3.5             | 4.1             | 3.5               | 4.5               |
| H28 <sub>A</sub>  | 27.3           | 41.4           | 27.2             | 46.1             | 3.8             | 5.4             | 3.8               | 5.5               |
| H28 <sub>B</sub>  | 27.2           | 42.9           | 27.1             | 45.3             | 3.9             | 4.0             | 3.9               | 4.8               |
| H37 <sub>A</sub>  | 26.6           | 43.2           | 26.6             | 45.8             | 3.6             | 3.9             | 3.6               | 4.3               |
| H37 <sub>B</sub>  | 26.8           | 44.0           | 26.8             | 48.6             | 3.7             | 3.7             | 3.7               | 4.3               |
| Y115 <sub>A</sub> | 27.6           | 41.7           | 27.5             | 45.9             | 3.8             | 4.3             | 3.7               | 4.7               |
| Y115 <sub>B</sub> | 27.3           | 40.1           | 27.3             | 43.0             | 3.7             | 6.0             | 3.7               | 6.1               |
| Y397 <sub>A</sub> | 26.5           | 43.1           | 26.4             | 49.1             | 3.7             | 4.2             | 3.6               | 4.2               |
| Y397 <sub>B</sub> | 25.8           | 39.1           | 25.7             | 44.7             | 3.5             | 4.2             | 3.5               | 4.5               |
| Y927 <sub>A</sub> | 30.0           | 41.2           | 27.3             | 45.6             | 3.7             | 4.7             | 3.6               | 4.7               |
| Y927 <sub>B</sub> | 27.5           | 41.7           | 27.5             | 46.4             | 3.6             | 4.7             | 3.6               | 4.7               |

Different parameters are listed for each fermentation: pH<sub>i</sub> = initial pH, pH<sub>f</sub> = final pH, pH<sub>min</sub> = minimal pH, pH<sub>max</sub> = maximal pH, T<sub>i</sub> = initial temperature, T<sub>f</sub> = final temperature, T<sub>min</sub> = minimal temperature, T<sub>max</sub> = maximal temperature. Spontaneous fermentations (S<sub>A</sub> and S<sub>B</sub>) and inoculated fermentations (six yeast strains in duplicate). For H19, however, only one replicate was available.

**Table S6.** Overview of all detected lactic and acetic acid bacterial species in the different cocoa pulp fermentations in Malaysia.

|                                                                              | N° isolates | Time point (h) |    |    |    |    |
|------------------------------------------------------------------------------|-------------|----------------|----|----|----|----|
|                                                                              |             | 4              | 24 | 48 | 72 | 96 |
| Lactic acid bacteria                                                         |             |                |    |    |    |    |
| <b>Inoculated</b>                                                            |             |                |    |    |    |    |
| <i>Lactobacillus fermentum</i> (99.6%)                                       | 22          | x              | x  | x  | x  | x  |
| <i>Leuconostoc (pseudo)mesenteroides</i> (98.2%)                             | 19          | x              | x  |    | x  | x  |
| <i>Lactobacillus plantarum/paraplantarum/pentosus/fabifermentans</i> (99.6%) | 17          |                | x  | x  | x  |    |
| <i>Fructobacillus pseudoficulneus</i>                                        | 11          | x              | x  |    |    |    |
| <i>Lactobacillus amylovorus/ultunensis/gallinarum</i> (99.6%)                | 9           | x              | x  |    |    | x  |
| <i>Lactobacillus brevis</i> (99.5%)                                          | 5           |                |    | x  | x  |    |
| <i>Fructobacillus tropaeoli</i> (99.6%)                                      | 4           |                | x  | x  | x  |    |
| <i>Lactobacillus mali/aquaticus/hordei</i> (99.3%)                           | 2           |                |    | x  | x  |    |
| <i>Lactobacillus rhamnosus</i> (99.1%)                                       | 1           |                |    |    | x  |    |
| <b>Spontaneous</b>                                                           |             |                |    |    |    |    |
| <i>Lactobacillus fermentum</i> (99.6%)                                       | 17          | x              | x  | x  | x  | x  |
| <i>Lactobacillus plantarum/paraplantarum/pentosus/fabifermentans</i> (99.6%) | 4           | x              | x  | x  |    |    |
| <i>Lactobacillus brevis</i> (99.5%)                                          | 3           |                | x  | x  |    |    |
| <i>Leuconostoc (pseudo)mesenteroides</i> (98.2%)                             | 2           |                | x  |    |    |    |
| <i>Fructobacillus tropaeoli</i> (99.6%)                                      | 1           |                |    | x  |    |    |
| Acetic acid bacteria                                                         |             |                |    |    |    |    |
| <b>Inoculated</b>                                                            |             |                |    |    |    |    |
| <i>Acetobacter pasteurianus</i> (99.9%)                                      | 82          | x              | x  | x  | x  | x  |
| <i>Acetobacter tropicalis/senegalensis</i> (99.1%)                           | 15          | x              | x  | x  |    | x  |
| <i>Acetobacter ghanensis</i>                                                 | 1           |                |    | x  |    |    |
| <b>Spontaneous</b>                                                           |             |                |    |    |    |    |
| <i>Acetobacter pasteurianus</i> (99.9%)                                      | 22          | x              | x  | x  | x  | x  |
| <i>Acetobacter tropicalis/senegalensis</i> (99.1%)                           | 5           | x              | x  | x  |    |    |

All fermentations were performed in October-November 2013 in Malaysia. Data is collected from 11 inoculated and 2 spontaneous fermentations. Bacterial isolates were identified by (GTG)<sub>5</sub> rep-PCR fingerprinting, clustering and 16S rDNA sequencing of several representatives of the different clusters. Obtained sequences were compared to type strain sequences and species were identified based

on the highest identity (%) of the BLAST output. Percentages of identity are reported when <100% identity. Multiple identities are given in the case of ambiguous identification.

**Table S7.** Population sizes of four most prevalent yeast species during spontaneous and inoculated cocoa pulp fermentations.

|                                                 | Time<br>(h) | log (CFU g <sup>-1</sup> ) |                  |                  |                  |                  |                |                |                   |                   |                   |                   |                   |                   |
|-------------------------------------------------|-------------|----------------------------|------------------|------------------|------------------|------------------|----------------|----------------|-------------------|-------------------|-------------------|-------------------|-------------------|-------------------|
|                                                 |             | H19 <sub>A</sub>           | H28 <sub>A</sub> | H28 <sub>B</sub> | H37 <sub>A</sub> | H37 <sub>B</sub> | S <sub>A</sub> | S <sub>B</sub> | Y115 <sub>A</sub> | Y115 <sub>B</sub> | Y927 <sub>A</sub> | Y927 <sub>B</sub> | Y397 <sub>A</sub> | Y397 <sub>B</sub> |
| <i>Hanseniaspora thailandica</i>                | 4           | 4.43                       | 1.97             | 2.68             | 2.59             | 1.31             | 2.42           | 5.50           | 1.14              | 2.98              | 2.71              | 3.58              | 2.65              | -                 |
|                                                 | 24          | -                          | -                | -                | -                | -                | 3.21           | 1.24           | -                 | -                 | 2.32              | -                 | 1.47              | -                 |
|                                                 | 48          | -                          | -                | -                | -                | -                | -              | -              | -                 | -                 | -                 | -                 | -                 | -                 |
|                                                 | 72          | -                          | -                | -                | -                | -                | -              | -              | -                 | -                 | -                 | -                 | -                 | -                 |
|                                                 | 96          | -                          | -                | -                | -                | -                | -              | -              | -                 | -                 | -                 | -                 | -                 | -                 |
| <i>Hanseniaspora opuntiae/lachancei</i>         | 4           | -                          | 1.97             | -                | 1.03             | 1.75             | 0.35           | -              | 0.76              | -                 | 0.78              | 1.99              | -                 | 0.39              |
|                                                 | 24          | -                          | -                | -                | -                | -                | -              | 1.24           | -                 | -                 | -                 | -                 | -                 | -                 |
|                                                 | 48          | -                          | -                | -                | -                | -                | -              | -              | -                 | -                 | -                 | -                 | -                 | -                 |
|                                                 | 72          | -                          | -                | -                | -                | -                | -              | -              | -                 | -                 | -                 | -                 | -                 | -                 |
|                                                 | 96          | -                          | -                | -                | -                | -                | -              | -              | -                 | -                 | -                 | -                 | -                 | -                 |
| <i>Saccharomyces cerevisiae</i><br>(inoculated) | 4           | 2.01                       | 1.97             | 3.45             | 2.07             | 1.75             | -              | -              | 3.42              | 2.60              | 2.71              | 0.80              | 3.03              | 5.50              |
|                                                 | 24          | 7.54                       | 7.77             | 6.90             | 6.83             | 6.81             | -              | -              | 6.87              | 7.00              | 4.73              | 6.87              | 5.14              | 7.81              |
|                                                 | 48          | 8.12                       | 7.48             | 7.15             | 7.76             | 7.59             | -              | -              | 5.65              | 7.90              | 7.71              | 7.83              | 6.51              | 7.66              |
|                                                 | 72          | 4.98                       | 6.41             | 6.85             | 5.18             | -                | -              | -              | 4.11              | 5.98              | 5.97              | 6.49              | -                 | 0.35              |
|                                                 | 96          | -                          | 5.01             | 6.47             | 0.27             | -                | -              | -              | 2.59              | 2.06              | 4.97              | 5.64              | -                 | -                 |
| <i>Saccharomyces cerevisiae</i><br>(other)      | 4           | -                          | 0.39             | -                | -                | 0.44             | 0.69           | -              | -                 | 0.37              | -                 | -                 | -                 | -                 |
|                                                 | 24          | -                          | -                | 0.77             | 0.76             | -                | 1.28           | 2.49           | 0.76              | 0.78              | 0.68              | 0.76              | 0.73              | -                 |
|                                                 | 48          | -                          | -                | 0.79             | -                | -                | 7.14           | 7.25           | 2.42              | -                 | -                 | -                 | -                 | -                 |
|                                                 | 72          | -                          | -                | -                | -                | -                | -              | -              | 1.76              | -                 | 0.66              | 0.72              | -                 | 2.12              |
|                                                 | 96          | -                          | 0.36             | -                | 0.27             | -                | -              | 0.29           | 0.43              | -                 | -                 | -                 | -                 | -                 |
| <i>Pichia kudriavzevii</i>                      | 4           | -                          | -                | -                | -                | -                | 1.04           | -              | -                 | -                 | -                 | -                 | -                 | -                 |
|                                                 | 24          | -                          | -                | -                | -                | -                | 0.64           | -              | -                 | -                 | -                 | -                 | -                 | -                 |
|                                                 | 48          | -                          | -                | -                | -                | -                | -              | -              | -                 | -                 | -                 | -                 | -                 | -                 |
|                                                 | 72          | -                          | -                | -                | -                | -                | -              | -              | -                 | -                 | -                 | -                 | -                 | -                 |
|                                                 | 96          | -                          | -                | -                | -                | 2.22             | -              | -              | 0.43              | 1.29              | 2.26              | -                 | 0.28              | -                 |

The relative populations sizes of the different yeast species were calculated based on a representative number of yeast isolates taken per time point (see Materials and Methods). Multiplication with the total yeast population size led to the population sizes, displayed as log(CFU g<sup>-1</sup>). Interdelta analysis was used to differentiate between the inoculated and other *Saccharomyces cerevisiae* strains.
